# Supplementary material for: Rubisco deactivation and chloroplast electron transport rates co-limit photosynthesis above optimal leaf temperature in terrestrial plants
Source: PubMed Central journal article supplement (PMC10192301; doi:10.1038/s41467-023-38496-4), 2023-05-17
Supplement: 41467_2023_38496_MOESM1_ESM.pdf [file 41467_2023_38496_MOESM1_ESM.pdf]

**Supplementary Table 1. Rubisco kinetic, activation state, and chloroplast electron transport rate ( $J$ ) parameters used in species independent predictions of the temperature response of photosynthetic net CO<sub>2</sub> assimilation ( $A_n$ ). Cool or warm distinguishes whether the parameter was derived from plants grown at a day growth temperature below or above 25°C, respectively.**

| Parameter                      | Source                                                                       | Definition                                                                           | Unit                                    | Value at 25°C | Ea (kJ Mol <sup>-1</sup> ) | Constant |
|--------------------------------|------------------------------------------------------------------------------|--------------------------------------------------------------------------------------|-----------------------------------------|---------------|----------------------------|----------|
| $n$                            | Onoda et al. 2017 <sup>1</sup>                                               | Number of Rubisco catalytic sites                                                    | $\mu\text{mol m}^{-2}$                  |               |                            | 25.6     |
| $k_{\text{cat}} - \text{cool}$ | Orr et al. 2016 <sup>2</sup> ; Galmés et al. 2016 <sup>3</sup><br>(in vitro) | The rate constant of Rubisco CO <sub>2</sub> fixation                                | CO <sub>2</sub> s <sup>-1</sup>         | 3.19          | 61.2                       |          |
| $k_{\text{cat}} - \text{warm}$ | Orr et al. 2016; Galmés et al. 2016<br>(in vitro)                            | The rate constant of Rubisco CO <sub>2</sub> fixation                                | CO <sub>2</sub> s <sup>-1</sup>         | 2.57          | 69.3                       |          |
| $K_c - \text{cool}$            | Orr et al. 2016; Galmés et al. 2016<br>(in vitro)                            | Michaelis-Menten constant of Rubisco for CO <sub>2</sub>                             | Pa                                      | 40.9          | 58.0                       |          |
| $K_c - \text{warm}$            | Orr et al. 2016; Galmés et al. 2016<br>(in vitro and in vivo)                | Michaelis-Menten constant of Rubisco for CO <sub>2</sub>                             | Pa                                      | 35.9          | 57.3                       |          |
| $K_o - \text{cool}$            | Orr et al. 2016; Galmés et al. 2016<br>(in vitro and in vivo)                | Michaelis-Menten constant of Rubisco for O <sub>2</sub>                              | kPa                                     | 29.2          | 27.4                       |          |
| $K_o - \text{warm}$            | Orr et al. 2016; Galmés et al. 2016<br>(in vitro and in vivo)                | Michaelis-Menten constant of Rubisco for O <sub>2</sub>                              | kPa                                     | 30.3          | 7.26                       |          |
| $\Gamma^* - \text{cool}$       | Orr et al. 2016; Galmés et al. 2016<br>(in vitro and in vivo)                | CO <sub>2</sub> compensation point in the absence of mitochondrial respiration       | Pa                                      | 3.94          | 26.7                       |          |
| $\Gamma^* - \text{warm}$       | Orr et al. 2016; Galmés et al. 2016<br>(in vitro and in vivo)                | CO <sub>2</sub> compensation point in the absence of mitochondrial respiration       | Pa                                      | 3.91          | 30.0                       |          |
| $E_d - \text{cool}$            | iteration of cool climate Rubisco activation state                           | Deactivation energy                                                                  | kJ mol <sup>-1</sup>                    |               |                            | 199      |
| $E_d - \text{warm}$            | iteration of warm climate Rubisco activation state                           | Deactivation energy                                                                  | kJ mol <sup>-1</sup>                    |               |                            | 212      |
| $T_{0.5} - \text{cool}$        | iteration of cool climate Rubisco activation state                           | Temperature at which enzymatic activity is halved                                    | Kelvin                                  |               |                            | 312      |
| $T_{0.5} - \text{warm}$        | iteration of warm climate Rubisco activation state                           | Temperature at which enzymatic activity is halved                                    | Kelvin                                  |               |                            | 316      |
| $J(T_o) - \text{cool}$         | June et al. 2004 <sup>4</sup> equation applied to $J$ of cool grown plants   | Electron transport rate at its temperature optimum                                   | $\mu\text{mol e m}^{-2} \text{ s}^{-1}$ |               |                            | 190      |
| $J(T_o) - \text{warm}$         | June et al. 2004 <sup>4</sup> equation applied to $J$ of warm grown plants   | Electron transport rate at its temperature optimum                                   | $\mu\text{mol e m}^{-2} \text{ s}^{-1}$ |               |                            | 242      |
| $T_o - \text{cool}$            | June et al. 2004 <sup>4</sup> equation applied to $J$ of cool grown plants   | The temperature optimum of $J$                                                       | °C                                      |               |                            | 31.7     |
| $T_o - \text{warm}$            | June et al. 2004 <sup>4</sup> equation applied to $J$ of warm grown plants   | The temperature optimum of $J$                                                       | °C                                      |               |                            | 36.9     |
| $\Omega - \text{cool}$         | June et al. 2004 <sup>4</sup> equation applied to $J$ of cool grown plants   | Difference in temperature from $T_o$ at which $J$ declines to e <sup>-1</sup> (0.37) | °C                                      |               |                            | 20.1     |
| $\Omega - \text{warm}$         | June et al. 2004 <sup>4</sup> equation applied to $J$ of warm grown plants   | Difference in temperature from $T_o$ at which $J$ declines to e <sup>-1</sup> (0.37) | °C                                      |               |                            | 21.3     |

<sup>1</sup> Onoda Y, Wright IJ, Evans JR, Hikosaka K, Kitajima K, Niinemets Ü, et al. Physiological and structural tradeoffs underlying the leaf economics spectrum. *New Phytol* 2017, 214(4): 1447-1463.

<sup>2</sup> Orr, D. J. et al. Surveying Rubisco diversity and temperature response to improve crop photosynthetic efficiency. *Plant Physiol.* 172, 707-717, doi:10.1104/pp.16.00750 (2016).

<sup>3</sup> Galmés, J., Hermida-Carrera, C., Laanisto, L. & Niinemets, Ü. A compendium of temperature responses of Rubisco kinetic traits: variability among and within photosynthetic groups and impacts on photosynthesis modeling. *J. Exp. Bot.* 67, 5067-5091, doi:DOI: 10.1093/jxb/erw267 (2016).

<sup>4</sup> June T, Evans JR, Farquhar GD. A simple new equation for the reversible temperature dependence of photosynthetic electron transport: a study on soybean leaf. *Funct Plant Biol*, 31(3): 275-283. doi:10.1071/FP03250 (2004)

**Supplementary Table 2. Metadata relating to published Rubisco activation state observations. Climate distinguishes whether the species was grown at a day growth temperature below (cool) or above (warm) 25°C. Where plants were grown at 25°C, cool or warm grown distinction was made based on whether the peak in photosynthesis was below or above 30°C, respectively.**

| Species                       | Climate | Plant Functional Type | Day Growth temperature | Reference                                                                                                                                      | DOIs                                                                                                                                                   |
|-------------------------------|---------|-----------------------|------------------------|------------------------------------------------------------------------------------------------------------------------------------------------|--------------------------------------------------------------------------------------------------------------------------------------------------------|
| <i>Arabidopsis thaliana</i>   | cool    | herb/grass            | 21; 23                 | Carmo-Silva & Salvucci 2011 <sup>#</sup> ; Kim & Portis 2005; Salvucci et al. 2006                                                             | 10.1007/s11120-011-9667-8; 10.1093/pcp/pci052; 10.1093/jxb/erl140                                                                                      |
| <i>Camelina sativa</i>        | cool    | herb/grass            | 23; 25                 | Carmo-Silva & Salvucci 2011; Carmo-Silva & Salvucci 2012                                                                                       | 10.1007/s11120-011-9667-8; 10.1007/s00425-012-1691-1                                                                                                   |
| <i>Deschampsia antarctica</i> | cool    | herb/grass            | 12                     | Salvucci & Crafts-Brandner 2004                                                                                                                | 10.1104/pp.103.038323                                                                                                                                  |
| <i>Gossypium hirsutum</i>     | warm    | herb/grass            | 25; 28                 | Carmo-Silva & Salvucci 2011; Feller et al. 1998; Law & Crafts-Brandner 1999; Crafts-Brandner & Salvucci 2000; Salvucci & Crafts-Brandner 2004; | 10.1007/s11120-011-9667-8; 10.1104/pp.116.2.539; 10.1104/pp.120.1.173; 10.1073/pnas.230451497; 10.1111/j.1399-3054.2004.00419.x; 10.1007/s004250000364 |
| <i>Ipomoea batatas</i>        | warm    | herb/grass            | 27                     | Crafts-Brandner & Law 2000                                                                                                                     | 10.1104/pp.105.066233                                                                                                                                  |
| <i>Larrea tridentata</i>      | warm    | shrub                 | 28                     | Salvucci & Crafts-Brandner 2004                                                                                                                | 10.1104/pp.103.038323                                                                                                                                  |
| <i>Nicotiana rusticum</i>     | warm    | herb/grass            | 25                     | Crafts-Brandner & Salvucci 2000                                                                                                                | 10.1073/pnas.230451497                                                                                                                                 |
| <i>Nicotiana tobacum</i>      | warm    | herb/grass            | 28; 30                 | Carmo-Silva & Salvucci 2011; Carmo-Silva & Salvucci 2012; Kubien & Sage 2008; Yamori & von Caemmerer 2009                                      | 10.1007/s11120-011-9667-8; 10.1007/s00425-012-1691-1; 10.1111/j.1365-3040.2008.01778.x; 10.1104/pp.109.146514                                          |
| <i>Oryza sativa</i>           | warm    | herb/grass            | 26; 28                 | Makino & Sage 2007;                                                                                                                            | 10.1093/pcp/pcm118; 10.1111/j.1399-3054.2012.01597.x                                                                                                   |
| <i>Pisum sativum</i>          | cool    | herb/grass            | 25                     | Scafaro et al. 2012                                                                                                                            | 10.1111/j.1365-3040.2005.01289.x                                                                                                                       |
| <i>Populus balsamifera</i>    | warm    | temperate tree        | 25                     | Haldimann & Feller 2005                                                                                                                        | 10.1111/j.1365-3040.2005.01289.x                                                                                                                       |
| <i>Populus deltoides</i>      | warm    | temperate tree        | 25                     | Hozain et al. 2009                                                                                                                             | 10.1093/treephys/tpp091                                                                                                                                |
| <i>Quercus pubescens</i>      | cool    | temperate tree        | 25                     | Hozain et al. 2009                                                                                                                             | 10.1093/treephys/tpp091                                                                                                                                |
| <i>Spinacia Oleracea</i>      | cool    | herb/grass            | 15                     | Haldimann & Feller 2004                                                                                                                        | 10.1111/j.1365-3040.2004.01222.x                                                                                                                       |
| <i>Triticum aestivum</i>      | cool    | herb/grass            | 25                     | Yamori et al. 2006                                                                                                                             | 10.1111/j.1365-3040.2006.01550.x                                                                                                                       |
| <i>Vitis amurensis</i>        | warm    | shrub                 | 25                     | Law & Crafts-Brandner 1999                                                                                                                     | 10.1104/pp.120.1.173                                                                                                                                   |
| <i>Zea mays</i>               | warm    | herb/grass            | 28                     | Luo et al. 2011                                                                                                                                | 10.1371/journal.pone.0023033                                                                                                                           |
|                               |         |                       |                        | Crafts-Brandner & Salvucci 2002                                                                                                                | 10.1104/pp.002170                                                                                                                                      |

<sup>#</sup> Carmo-Silva & Salvucci 2011 (DOI:10.1007/s11120-011-9667-8) is based on Rubisco activation activity rather than Rubisco activation state perse. We have treated them as equivalent in the context of Rubisco deactivation

**Supplementary Table 3. Metadata relating to published maximum chloroplast electron transport rate ( $J$ ) or quantum efficiency of PSII ( $\phi$ PSII) temperature response curves.  $J$  was estimated by chlorophyll fluorescence or gas-exchange.  $T_o$  is the temperature optimum of  $J$  ( $^{\circ}\text{C}$ ),  $J(T_o)$  is  $J$  at the temperature optimum ( $\mu\text{mol e m}^{-2} \text{s}^{-1}$ ), and  $\Omega$  is the difference in temperature from  $T_o$  at which  $J$  declines to  $e^{-1}$  (0.37) ( $^{\circ}\text{C}$ ). Missing  $J(T_o)$  values are where curves were relativised and therefore the parameter was not obtained, including when curves were based on  $\phi$ PSII and  $J(T_o)$  is not applicable. Climate distinguishes whether the species was grown at a day growth temperature below (cool) or above (warm)  $25^{\circ}\text{C}$ . Where plants were grown at  $25^{\circ}\text{C}$ , cool or warm grown distinction was made based on whether  $T_o$  was below or above  $30^{\circ}\text{C}$ , respectively.**

| Species                        | Climate | Plant Functional Type | Day Growth | Reference                                    | DOIs                                                | parameter   | $T_o$ | $J(T_o)$ | $\Omega$ |
|--------------------------------|---------|-----------------------|------------|----------------------------------------------|-----------------------------------------------------|-------------|-------|----------|----------|
| <i>Abutilon theophrasti</i>    | cool    | herb/grass            | 16         | Ziska 2001; June et al. 2004                 | 10.1034/j.1399-3054.2001.1110309.x; 10.1071/FP03250 | J           | 28.4  | 202      | 22.3     |
| <i>Acer pseudoplatanus</i>     | cool    | temperate tree        | 22         | Dreyer et al. 2001; June et al. 2004         | 10.1093/treephys/21.4.223; 10.1071/FP03250          | J           | 30.6  | 167.8    | 16.9     |
| <i>Betula pendula</i>          | cool    | temperate tree        | 22         | Dreyer et al. 2001; June et al. 2004         | 10.1093/treephys/21.4.223; 10.1071/FP03250          | J           | 35.9  | 161.7    | 21.6     |
| <i>Betula pendula</i>          | cool    | temperate tree        | 20         | Wittmann & Pfanz 2007                        | 10.1093/jxb/erm313                                  | $\phi$ PSII | 27.2  |          | 25.4     |
| <i>Eucalyptus pauciflora</i>   | warm    | temperate tree        | 25         | Kirschbaum & Farquhar 1984; June et al. 2004 | 10.1071/PP9840519; 10.1071/FP03250                  | J           | 31.8  |          | 22       |
| <i>Fagus sylvatica</i>         | cool    | temperate tree        | 22         | Dreyer et al. 2001; June et al. 2004         | 10.1093/treephys/21.4.223; 10.1071/FP03250          | J           | 34.7  | 166.9    | 18.7     |
| <i>Fagus sylvatica</i>         | cool    | temperate tree        | 20         | Wittmann & Pfanz 2007                        | 10.1093/jxb/erm313                                  | $\phi$ PSII | 36.1  |          | 32.2     |
| <i>Fraxinus excelsior</i>      | cool    | temperate tree        | 22         | Dreyer et al. 2001; June et al. 2004         | 10.1093/treephys/21.4.223; 10.1071/FP03250          | J           | 32.1  | 189      | 16.7     |
| <i>Glycine max</i>             | warm    | herb/grass            | 32         | Harley et al. 1992; June et al. 2004         | 10.1111/j.1365-3040.1992.tb00974.x; 10.1071/FP03250 | J           | 39.3  | 219      | 19.8     |
| <i>Ipomoea batatas</i>         | warm    | herb/grass            | 27         | Cen & Sage 2005                              | 10.1104/pp.105.066233                               | J           | 30.6  | 351      | 14.9     |
| <i>Juglans regia</i>           | cool    | temperate tree        | 22         | Dreyer et al. 2001; June et al. 2004         | 10.1093/treephys/21.4.223; 10.1071/FP03250          | J           | 35.7  | 143.2    | 18.5     |
| <i>Lycopersicon esculentum</i> | warm    | herb/grass            | 25         | Havaux 1992                                  | 10.1104/pp.100.1.424                                | $\phi$ PSII | 30.3  |          | 12.3     |
| <i>Musa sp.</i>                | warm    | herb/grass            | 30         | Dongsansuk & Neüner 2013                     | 10.1007/s11099-012-0070-2                           | $\phi$ PSII | 29.4  |          | 26.2     |
| <i>Narcissus cyclamineus</i>   | cool    | herb/grass            | 20         | Dongsansuk & Neüner 2013                     | 10.1007/s11099-012-0070-2                           | $\phi$ PSII | 22.8  |          | 25.8     |
| <i>Nicotiana tobacum</i>       | warm    | herb/grass            | 30         | Yamori et al. 2011                           | 10.1104/pp.110.168435                               | J           | 32.1  | 177      | 18.6     |
| <i>Nicotinia tobacum</i>       | warm    | herb/grass            | 25         | Bernacchi et al. 2003; June et al. 2004      | 10.1046/j.0016-8025.2003.01050.x; 10.1071/FP03250   | J           | 55.6  | 408      | 30.2     |
| <i>Oryza sativa</i>            | warm    | herb/grass            | 26         | Makino and Sage 2007                         | 10.1093/pcp/pcm118                                  | $\phi$ PSII | 34.2  |          | 21.3     |
| <i>Pinus radiata</i>           | cool    | needle-leaf tree      | 24         | Walcroft et al. 1997; June et al. 2004       | 10.1046/J.1365-3040.1997.D01-31.X; 10.1071/FP03250  | J           | 34.6  | 63.1     | 23.9     |
| <i>Pinus sylvestris</i>        | cool    | needle-leaf tree      | 20         | Wang et al. 1996; June et al. 2004           | 10.1016/0168-1923(96)02329-5                        | J           | 21.9  | 155.7    | 14.3     |
| <i>Plantago asiatica</i>       | cool    | herb/grass            | 15         | Hikosaka et al 2005                          | 10.1093/jxb/erj049                                  | J           | 32.6  | 203      | 21.8     |
| <i>Plantago asiatica</i>       | warm    | herb/grass            | 30         | Hikosaka et al 2005                          | 10.1093/jxb/erj049                                  | J           | 37.2  | 209      | 22.6     |
| <i>Populus tremula</i>         | cool    | temperate tree        | 15         | Niinemets et al. 1999; June et al. 2004      | 10.1046/j.1365-3040.1999.00510.x; 10.1071/FP0325    | J           | 35.6  | 191.4    | 12.5     |
| <i>Populus tremula</i>         | cool    | temperate tree        | 17         | Huve et al 2006                              | 10.1111/j.1365-3040.2005.01414.x                    | J           | 31.9  |          | 17       |
| <i>Prunus persica</i>          | warm    | temperate tree        | 29         | Walcroft et al. 2002; June et al. 2004       | 10.1093/treephys/22.13.929; 10.1071/FP03250         | J           | 40    | 175      | 23.6     |
| <i>Quercus petraea</i>         | cool    | temperate tree        | 22         | Dreyer et al. 2001; June et al. 2004         | 10.1093/treephys/21.4.223; 10.1071/FP03250          | J           | 39.4  | 231.6    | 22.5     |
| <i>Quercus robur</i>           | cool    | temperate tree        | 22         | Dreyer et al. 2001; June et al. 2004         | 10.1093/treephys/21.4.223; 10.1071/FP03250          | J           | 40.6  | 226.3    | 25.8     |
| <i>Solanum tuberosum</i>       | cool    | herb/grass            | 25         | Havaux 1992                                  | 10.1104/pp.100.1.424                                | $\phi$ PSII | 25.2  |          | 12.9     |
| <i>Spinacia Oleracea</i>       | cool    | herb/grass            | 15         | Yamori et al 2008                            | 10.1093/pcp/pcn030                                  | J           | 29.4  | 195      | 17       |
| <i>Spinacia Oleracea</i>       | warm    | herb/grass            | 30         | Yamori et al 2008                            | 10.1093/pcp/pcn030                                  | J           | 36.4  | 158      | 20.1     |
| <i>Tilia cordata</i>           | cool    | temperate tree        | 15         | Niinemets et al. 1999; June et al. 2004      | 10.1046/j.1365-3040.1999.00510.x; 10.1071/FP0325    | J           | 39.2  | 52.2     | 16.9     |
| <i>Triticum aestivum</i>       | cool    | herb/grass            | 25         | Yamasaki et al. 2002                         | 10.1104/pp.010919                                   | J           | 22.8  | 519      | 19.8     |
| <i>Triticum aestivum</i>       | cool    | herb/grass            | 25         | Silva-Pérez et al. 2017                      | 10.1111/pce.12953                                   | J           | 29.6  | 179      | 26.9     |
| <i>Vitis vinifera</i>          | warm    | shrub                 | 27         | Greer 2022                                   | 10.1071/FP21331                                     | $\phi$ PSII | 38.6  |          | 14.6     |

**Supplementary Table 4. Metadata relating to published photosynthesis temperature response curves and model outcomes. Climate distinguishes whether the species was grown at a day growth temperature below (cool) or above (warm) 25°C. Where plants were grown at 25°C, cool or warm growth distinction was made based on whether the peak in photosynthesis was below or above 30°C, respectively.  $mn$  is the modeled number of Rubisco catalytic sites ( $\mu\text{mol m}^{-2}$ ) and  $J$  the electron transport rate ( $\mu\text{mol e m}^{-2} \text{s}^{-1}$ ) calculated to match  $A_n$  at 22°C. The mean root mean squared error (RMSE) of observed net  $\text{CO}_2$  assimilation ( $A_n$ ) versus predicted carboxylation limited assimilation ( $A_c$ ) or RuBP regeneration limited assimilation ( $A_r$ ) are provided for each temperature response curve.**

| Species                                                  | Climate | Plant Functional Type | Day Growth  |      | RMSE  |           | Reference                           | DOIs                                |
|----------------------------------------------------------|---------|-----------------------|-------------|------|-------|-----------|-------------------------------------|-------------------------------------|
|                                                          |         |                       | temperature | $mn$ | $J$   | ( $A_c$ ) |                                     |                                     |
| <i>Arabidopsis thaliana</i>                              | cool    | herb/grass            | 21          | 21.6 | 112.4 | 1.2       | 1.9 Kim & Portis 2005               | 10.1093/pcp/pci052                  |
| <i>Atractocarpus fitzalanii</i>                          | warm    | tropical tree         | 27.5        | 16.7 | 94.6  | 0.8       | 0.8 Choury et al. 2022              | 10.1111/nph.18077                   |
| <i>Atractocarpus fitzalanii</i>                          | cool    | tropical tree         | 24          | 10.6 | 54.9  | 2.9       | 2.6 Choury et al. 2022              | 10.1111/nph.18077                   |
| <i>Atractocarpus fitzalanii</i>                          | warm    | tropical tree         | 31          | 15.5 | 87.8  | 1.8       | 1.7 Choury et al. 2022              | 10.1111/nph.18077                   |
| <i>Atriplex glabriuscula</i>                             | cool    | herb/grass            | 10          | 31.7 | 171.2 | 7.4       | 8.8 Berry & Björkman 1980           | 10.1146/annurev.pp.31.060180.002423 |
| <i>Backhousia citriodora</i>                             | warm    | tropical tree         | 27.5        | 18.5 | 104.9 | 1.5       | 1.2 Choury et al. 2022              | 10.1111/nph.18077                   |
| <i>Backhousia citriodora</i>                             | warm    | tropical tree         | 27.5        | 19.5 | 110.4 | 3.8       | 3.7 Choury et al. 2022              | 10.1111/nph.18077                   |
| <i>Calophyllum longifolium</i>                           | warm    | tropical tree         | 32.6        | 14.1 | 80.1  | 3.8       | 3.9 Slot & Winter 2017              | 10.1111/pce.13071                   |
| <i>Camelina sativa</i>                                   | cool    | herb/grass            | 25          | 30.4 | 154.6 | 2.3       | 2.1 Carmo-Silva & Salvucci 2012     | 10.1007/s00425-012-1691-1           |
| <i>Cryptocarya laevigata</i>                             | warm    | tropical tree         | 27.5        | 9.0  | 50.9  | 0.4       | 0.5 Choury et al. 2022              | 10.1111/nph.18077                   |
| <i>Cryptocarya laevigata</i>                             | cool    | tropical tree         | 24          | 10.1 | 52.6  | 0.4       | 0.8 Choury et al. 2022              | 10.1111/nph.18077                   |
| <i>Deschampsia antarctica</i>                            | cool    | herb/grass            | 12          | 21.7 | 111.2 | 6.6       | 7.9 Salvucci & Crafts-Brandner 2004 | 10.1104/pp.103.038323               |
| <i>Eucalyptus carnaldulensis</i>                         | warm    | temperate tree        | 35          | 17.4 | 98.8  | 0.6       | 1.1 Ferrar et al. 1989              | 10.1071/PP9890199                   |
| <i>Eucalyptus crebra</i>                                 | warm    | temperate tree        | 29          | 22.3 | 126.6 | 6.9       | 7.1 Yin et al. 2012                 | 10.1093/treephys/tp141              |
| <i>Eucalyptus globulus</i>                               | cool    | temperate tree        | 25          | 22.8 | 117.7 | 3.2       | 3.4 Battaglia et al. 1996           | 10.1093/treephys/116.1-2.81         |
| <i>Eucalyptus miniata</i>                                | warm    | temperate tree        | 35          | 14.4 | 81.4  | 1.7       | 1.7 Ferrar et al. 1989              | 10.1071/PP9890199                   |
| <i>Eucalyptus pauciflora</i>                             | warm    | temperate tree        | 30          | 55.3 | 313.4 | 4.5       | 5.6 Hikosaka 1997                   | 10.1006/ambo.1997.0512              |
| <i>Eucalyptus pauciflora</i>                             | cool    | temperate tree        | 20          | 49.6 | 257.9 | 3.5       | 2.7 Hikosaka 1997                   | 10.1006/ambo.1997.0512              |
| <i>Eucalyptus regnans</i>                                | cool    | temperate tree        | 15          | 15.6 | 81.5  | 1.6       | 1.8 Warren 2008                     | 10.1093/treephys/28.1.11            |
| <i>Eucalyptus regnans</i>                                | warm    | temperate tree        | 30          | 18.3 | 103.9 | 1.6       | 2.3 Warren 2008                     | 10.1093/treephys/28.1.11            |
| <i>Eucalyptus tereticornis</i>                           | cool    | temperate tree        | 18          | 30.4 | 156.6 | 1.9       | 1.7 Kumarathunge et al 2020         | 10.1111/gcb.14975                   |
| <i>Ficus insipida</i>                                    | warm    | tropical tree         | 32.6        | 26.6 | 150.6 | 3.0       | 2.7 Slot & Winter 2017              | 10.1111/nph.18077                   |
| <i>Flindersia australis</i>                              | warm    | tropical tree         | 27.5        | 16.2 | 91.9  | 2.8       | 2.6 Choury et al. 2022              | 10.1111/nph.18077                   |
| <i>Flindersia australis</i>                              | warm    | tropical tree         | 31          | 13.8 | 78.5  | 2.6       | 2.4 Choury et al. 2022              | 10.1111/nph.18077                   |
| <i>Garcinia madruno</i>                                  | warm    | tropical tree         | 32.6        | 10.4 | 60.3  | 0.4       | 0.4 Slot & Winter 2017              | 10.1111/pce.13071                   |
| <i>Glycine max</i>                                       | warm    | herb/grass            | 35          | 34.8 | 199.8 | 1.7       | 2.2 Vu et al. 1997                  | 10.1046/j.1365-3040.1997.d01-10.x   |
| <i>Gossypium barbadense</i>                              | warm    | shrub                 | 32          | 31.5 | 178.6 | 3.7       | 1.9 Wise et al. 2004                | 10.1111/j.1365-3040.2004.01171.x    |
| <i>Gossypium hirsutum</i>                                | warm    | herb/grass            | 28          | 43.1 | 247.8 | 3.0       | 6.2 Law & Crafts-Brandner 1999      | 10.1104/pp.120.1.173                |
| <i>Gossypium hirsutum</i>                                | warm    | herb/grass            | 28          | 32.6 | 187.7 | 4.0       | 7.3 Crafts-Brandner & Law 2000      | 10.1007/s004250000364               |
| <i>Gossypium hirsutum</i>                                | warm    | herb/grass            | 25          | 41.8 | 239.9 | 3.2       | 5.8 Crafts-Brandner & Salvucci 2000 | 10.1073/pnas.230451497              |
| <i>Harungana montana</i>                                 | cool    | tropical montane      | 21.5        | 16.9 | 87.9  | 2.8       | 3.3 Dusenge et al. 2021             | 10.1111/gcb.15790                   |
| <i>Harungana montana</i>                                 | warm    | tropical montane      | 27          | 13.6 | 76.8  | 2.3       | 2.4 Dusenge et al. 2021             | 10.1111/gcb.15790                   |
| <i>Harungana montana</i>                                 | warm    | tropical montane      | 29.6        | 12.8 | 72.6  | 2.5       | 2.7 Dusenge et al. 2021             | 10.1111/gcb.15790                   |
| <i>Ipomoea batatas</i>                                   | warm    | herb/grass            | 27          | 23.0 | 130.6 | 1.6       | 1.6 Cen & Sage 2005                 | 10.1104/pp.105.066233               |
| <i>Lagerstroemia speciosa</i>                            | warm    | tropical tree         | 32.6        | 22.0 | 125.1 | 2.2       | 2.4 Slot & Winter 2017              | 10.1111/pce.13071                   |
| <i>Larrea divaricata</i>                                 | warm    | shrub                 | 44          | 26.3 | 149.3 | 8.9       | 6.2 Berry & Björkman 1980           | 10.1146/annurev.pp.31.060180.002423 |
| <i>Larrea tridentate</i>                                 | warm    | shrub                 | 28          | 39.6 | 226.6 | 3.4       | 4.7 Salvucci & Crafts-Brandner 2004 | 10.1104/pp.103.038323               |
| <i>Nerium oleander</i>                                   | warm    | shrub                 | 35          | 11.3 | 64.1  | 1.5       | 1.5 Ferrar et al. 1989              | 10.1071/PP9890199                   |
| <i>Nicotiana tobacum</i>                                 | warm    | herb/grass            | 28          | 36.3 | 200.1 | 3.1       | 2.7 Kubien & Sage 2008              | 10.1111/j.1365-3040.2008.01778.x    |
| <i>Nicotiana tobacum</i>                                 | cool    | herb/grass            | 20          | 25.9 | 134.4 | 3.3       | 2.6 Yamori & von Caemmerer 2009     | 10.1104/pp.109.146514               |
| <i>Nicotiana tobacum</i>                                 | warm    | herb/grass            | 27          | 36.2 | 205.0 | 1.7       | 2.1 Yamori & Makino 2011            | 10.1111/j.1365-3040.2011.02280.x    |
| <i>Nicotiana tobacum</i>                                 | warm    | herb/grass            | 30          | 24.2 | 137.3 | 0.8       | 0.5 Yamori & von Caemmerer 2009     | 10.1104/pp.109.146514               |
| <i>Ochroma pyramidale</i>                                | warm    | tropical tree         | 33          | 23.7 | 134.5 | 2.8       | 2.6 Cheesman & Winter 2013          | 10.1093/jxb/ert211                  |
| <i>Ormosia macrocalyx</i>                                | warm    | tropical tree         | 30          | 10.9 | 62.3  | 2.2       | 2.1 Cheesman & Winter 2013          | 10.1093/jxb/ert211                  |
| <i>Oryza meridionalis</i>                                | warm    | herb/grass            | 28          | 24.4 | 138.4 | 1.9       | 1.8 Scaforo et al. 2012             | 10.1111/j.1399-3054.2012.01597.x    |
| <i>Oryza sativa</i>                                      | warm    | herb/grass            | 27          | 39.4 | 223.1 | 1.7       | 0.8 Yamori & Makino 2011            | 10.1111/j.1365-3040.2011.02280.x    |
| <i>Oryza sativa</i>                                      | warm    | herb/grass            | 28          | 32.9 | 186.8 | 1.0       | 1.1 Scaforo et al. 2012             | 10.1111/j.1399-3054.2012.01597.x    |
| <i>Oryza sativa</i>                                      | warm    | herb/grass            | 26          | 40.9 | 231.8 | 3.1       | 3.6 Makino & Sage 2007              | 10.1093/pcp/pcm118                  |
| <i>Picea mariana</i>                                     | cool    | needle-leaf tree      | 22          | 10.2 | 53.0  | 1.4       | 1.6 Way & Sage 2008                 | 10.1111/j.1365-3040.2008.01842.x    |
| <i>Picea mariana</i>                                     | warm    | needle-leaf tree      | 30          | 11.2 | 63.2  | 0.9       | 1.1 Way & Sage 2008                 | 10.1111/j.1365-3040.2008.01842.x    |
| <i>Picea mariana</i>                                     | cool    | needle-leaf tree      | 22          | 9.8  | 51.0  | 1.9       | 2.2 Way & Sage 2008                 | 10.1111/j.1365-3040.2008.01842.x    |
| <i>Pinus taeda</i>                                       | warm    | needle-leaf tree      | 32          | 15.7 | 89.3  | 3.1       | 3.2 Yin et al. 2012                 | 10.1093/treephys/tp141              |
| <i>Pisum sativum</i>                                     | cool    | herb/grass            | 25          | 12.0 | 62.4  | 1.5       | 0.4 Haldimann & Feller 2005         | 10.1111/j.1365-3040.2005.01289.x    |
| <i>Plantago asiatica</i>                                 | cool    | herb/grass            | 15          | 30.1 | 156.3 | 1.2       | 1.5 Hikosaka et al. 2006            | 10.1093/jxb/erj049                  |
| <i>Populus balsamifera</i>                               | warm    | temperate tree        | 25          | 23.2 | 132.1 | 6.4       | 6.1 Hozain et al. 2009              | 10.1093/treephys/tp091              |
| <i>Populus maximowiczii</i> x <i>Populus balsamifera</i> | cool    | temperate tree        | 23          | 19.5 | 101.1 | 3.9       | 4.5 Benomar et al. 2019             | 10.1371/journal.pone.0206021        |
| <i>Populus maximowiczii</i> x <i>Populus balsamifera</i> | warm    | temperate tree        | 33          | 19.5 | 110.4 | 1.1       | 1.0 Benomar et al. 2019             | 10.1371/journal.pone.0206021        |
| <i>Populus maximowiczii</i> x <i>Populus nigra</i>       | cool    | temperate tree        | 23          | 15.6 | 81.0  | 2.0       | 2.1 Benomar et al. 2019             | 10.1371/journal.pone.0206021        |
| <i>Populus maximowiczii</i> x <i>Populus nigra</i>       | warm    | temperate tree        | 33          | 20.6 | 116.5 | 0.6       | 1.0 Benomar et al. 2019             | 10.1371/journal.pone.0206021        |
| <i>Quercus canariensis</i>                               | cool    | temperate tree        | 23          | 21.4 | 111.5 | 1.4       | 1.6 Warren & Dreyer 2006            | 10.1093/jxb/erl067                  |
| <i>Quercus pubescens</i>                                 | cool    | temperate tree        | 25          | 17.5 | 91.1  | 1.1       | 2.2 Haldimann & Feller 2004         | 10.1111/j.1365-3040.2004.01222.x    |
| <i>Rubus idaeus</i>                                      | cool    | shrub                 | 20          | 14.1 | 73.2  | 2.2       | 2.1 Choury et al. 2022              | 10.1111/pce.12997                   |
| <i>Sextonia rubra</i>                                    | warm    | tropical tree         | 30          | 12.8 | 76.4  | 0.5       | 0.8 Doughty & Goulden 2008          | 10.1029/2007JG000632                |
| <i>Spinacia Oleracea</i>                                 | cool    | herb/grass            | 15          | 17.8 | 92.5  | 3.1       | 3.6 Yamori et al. 2006              | 10.1111/j.1365-3040.2006.01550.x    |
| <i>Spinacia Oleracea</i>                                 | warm    | herb/grass            | 27          | 44.3 | 251.2 | 3.5       | 4.2 Yamori & Makino 2011            | 10.1111/j.1365-3040.2011.02280.x    |
| <i>Spinacia Oleracea</i>                                 | warm    | herb/grass            | 30          | 20.0 | 118.1 | 3.2       | 4.0 Yamori & Makino 2011            | 10.1111/j.1365-3040.2006.01550.x    |
| <i>Syzygium guineense</i>                                | cool    | tropical montane      | 21.5        | 12.8 | 66.4  | 1.8       | 2.1 Dusenge et al. 2021             | 10.1111/gcb.15790                   |
| <i>Syzygium guineense</i>                                | warm    | tropical montane      | 27          | 13.4 | 76.1  | 3.2       | 3.3 Dusenge et al. 2021             | 10.1111/gcb.15790                   |
| <i>Syzygium guineense</i>                                | warm    | tropical montane      | 29.6        | 14.7 | 83.3  | 3.2       | 3.3 Dusenge et al. 2021             | 10.1111/gcb.15790                   |
| <i>Tristaniaopsis Laurina</i>                            | warm    | tropical tree         | 27.5        | 17.7 | 100.1 | 3.9       | 4.1 Choury et al. 2022              | 10.1111/nph.18077                   |
| <i>Triticum aestivum</i>                                 | cool    | herb/grass            | 25          | 35.1 | 182.2 | 2.7       | 4.8 Law & Crafts-Brandner 1999      | 10.1104/pp.120.1.173                |
| <i>Triticum aestivum</i>                                 | warm    | herb/grass            | 27          | 35.7 | 202.3 | 2.8       | 3.1 Yamori & Makino 2011            | 10.1111/j.1365-3040.2011.02280.x    |
| <i>Vitis amurensis</i>                                   | warm    | shrub                 | 25          | 13.9 | 78.6  | 1.1       | 1.0 Luo et al. 2011                 | 10.1371/journal.pone.0023033        |
| <i>Xanthostemon chrysanthus</i>                          | warm    | tropical tree         | 27.5        | 22.6 | 127.9 | 4.7       | 4.5 Choury et al. 2022              | 10.1111/nph.18077                   |
| <i>Xanthostemon chrysanthus</i>                          | warm    | tropical tree         | 31          | 14.7 | 83.6  | 2.2       | 1.8 Choury et al. 2022              | 10.1111/nph.18077                   |

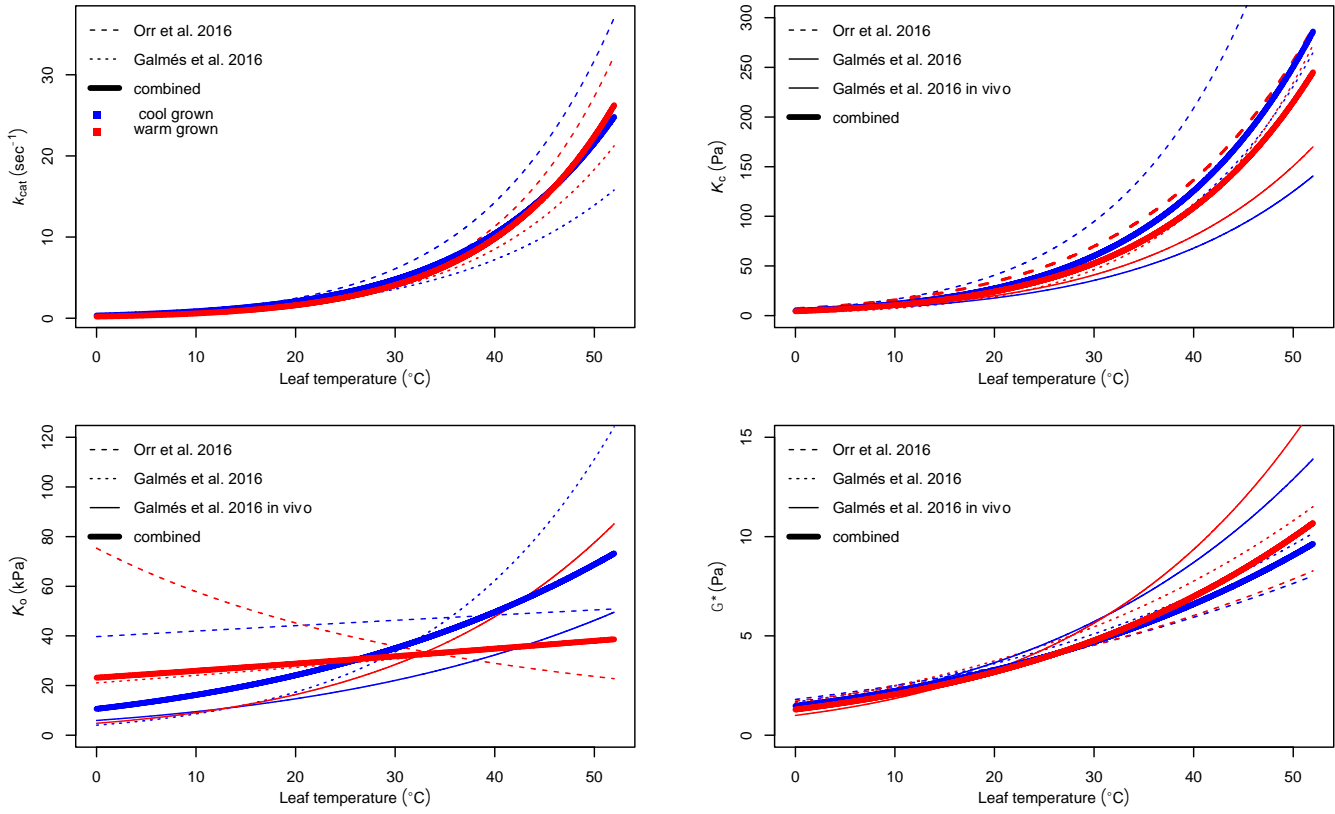

**Supplementary Figure 1.** The temperature response of Rubisco kinetics from multiple species studies that we have used for FvCB model parameterisation. The rate constant of Rubisco CO<sub>2</sub> fixation ( $k_{cat}$ ), the Michaelis-Menten constant of Rubisco for CO<sub>2</sub> ( $K_c$ ), the Michaelis-Menten constant of Rubisco for oxygen ( $K_o$ ), and the CO<sub>2</sub> compensation point in the absence of light respiration ( $\Gamma^*$ ). Refer to Supplementary Table 1 for values at 25°C and the corresponding activation Energy ( $E_a$ ) that each curve was derived from.

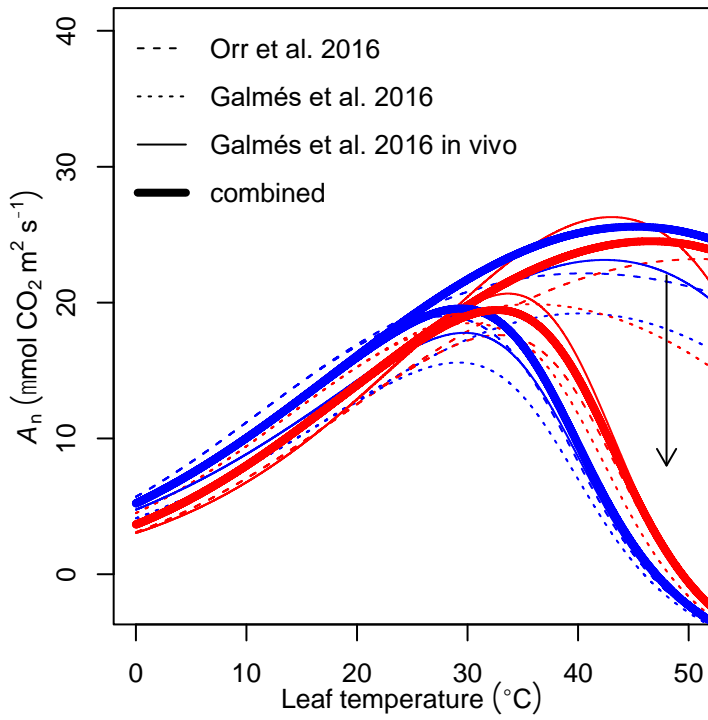

**Supplementary Figure 2.** The FvCB model was parameterised using either the *in vitro* Rubisco kinetics presented in Orr, et al. <sup>19</sup>, the *in vivo* and *in vitro* kinetics presented in Galmés, et al. <sup>18</sup>, or the combined mean value of all three. Model simulations were run with and without Rubisco activation included, evident by the distinctive decline in  $A_n$  at higher temperatures when activation was included (marked by the arrow).

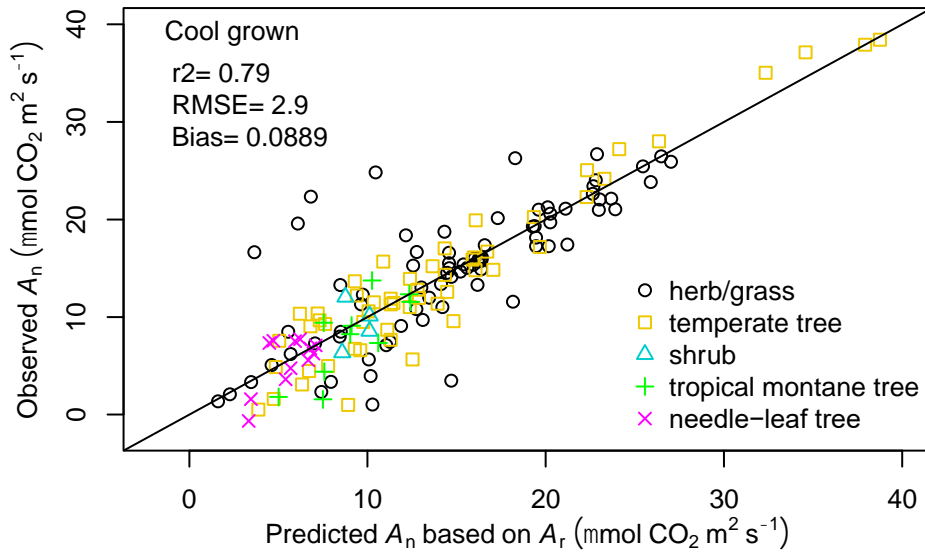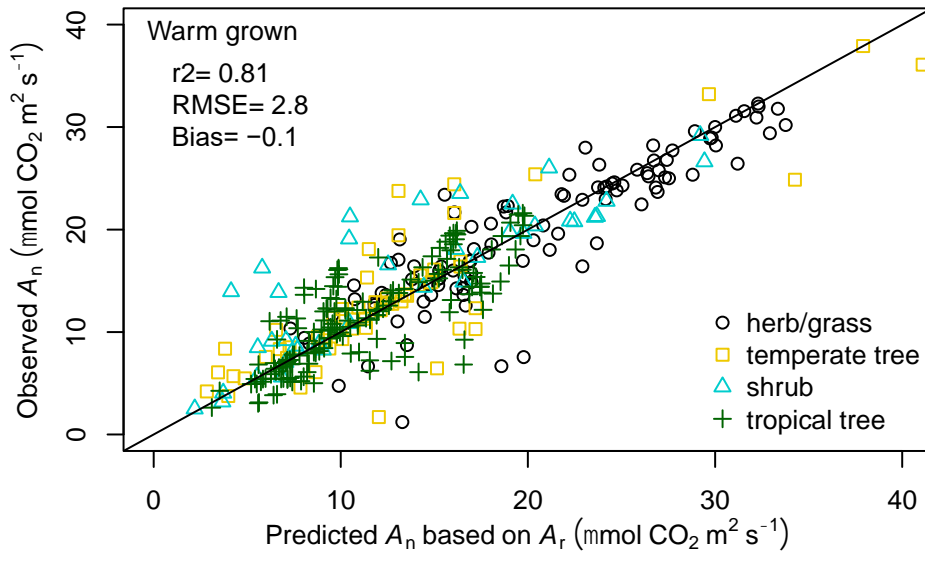

**Supplementary Figure 3.** Predictions of RuBB regeneration limited net CO<sub>2</sub> assimilation rates ( $A_r$ ) were plotted against corresponding observations for cool and warm grown plants. The coefficient of determination ( $r^2$ ), a 1:1 ratio (solid line), the root mean squared error (RMSE) between observed and predicted values, and the bias in observations being greater than predictions for each growth environment are provided. Plant functional types are indicated by differing colours and symbols.

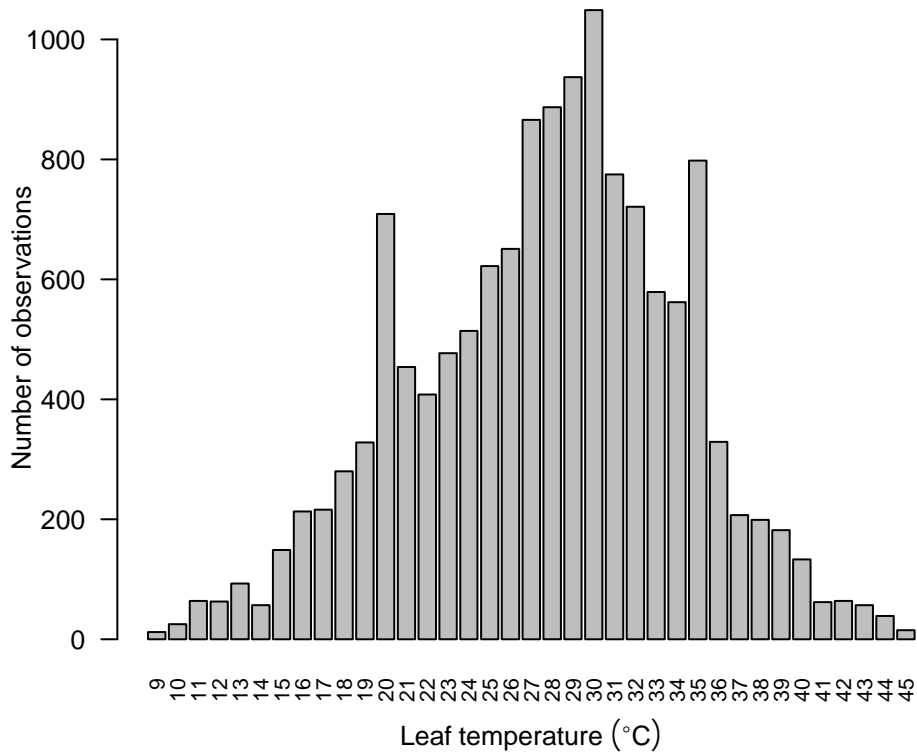

**Supplementary Figure 4.** The number of net CO<sub>2</sub> assimilation rate ( $A_n$ ) observations at each leaf temperature when binned per degree Celsius for the global gas-exchange dataset<sup>33</sup> analysed in Fig. 3b.

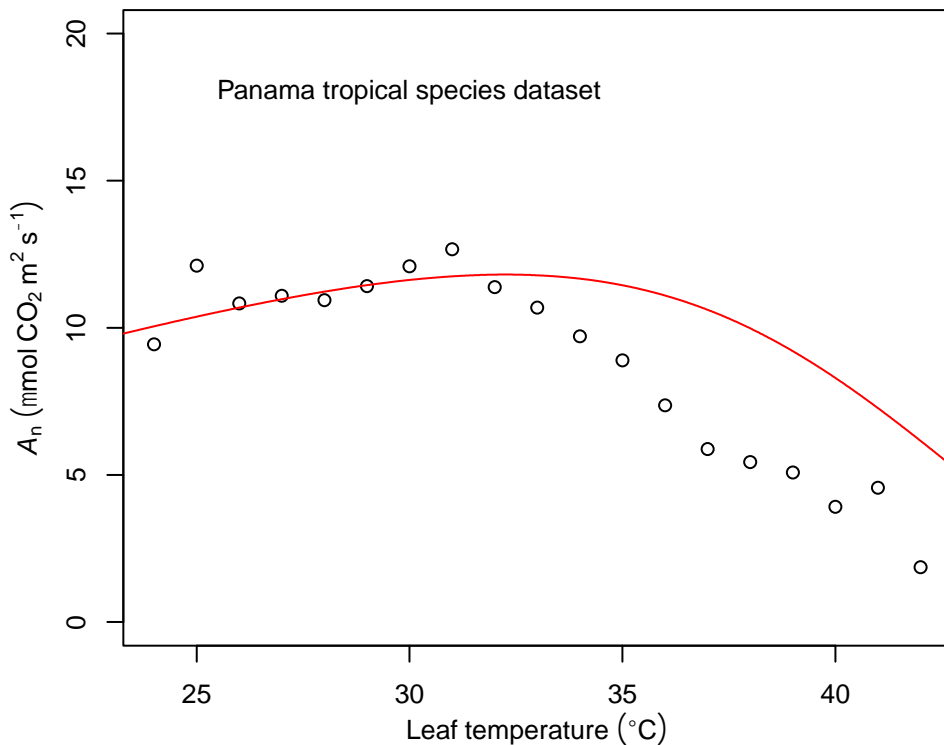

**Supplementary Figure 5.** The temperature response of net CO<sub>2</sub> assimilation rates ( $A_n$ ) in tropical rainforest tree and liana species from Panama<sup>12</sup>. Observations (open circles) are the mean  $A_n$  values binned per degree Celsius and consisting of 3942 observations from 42 species. The red curve is the predicted temperature response of  $A_c$  with Rubisco activation included for warm-grown plants. Note that the greater than predicted decline in observed  $A_n$  at temperatures above 30°C is consistent with the published observations of declines in stomatal conductance and intercellular CO<sub>2</sub> concentrations limiting photosynthesis in the study from which the data were collected<sup>12</sup>.



## Supplementary Figure 6. PRISMA flowchart

PRISMA 2020 flow diagram for new systematic reviews which included searches of databases, registers and other sources

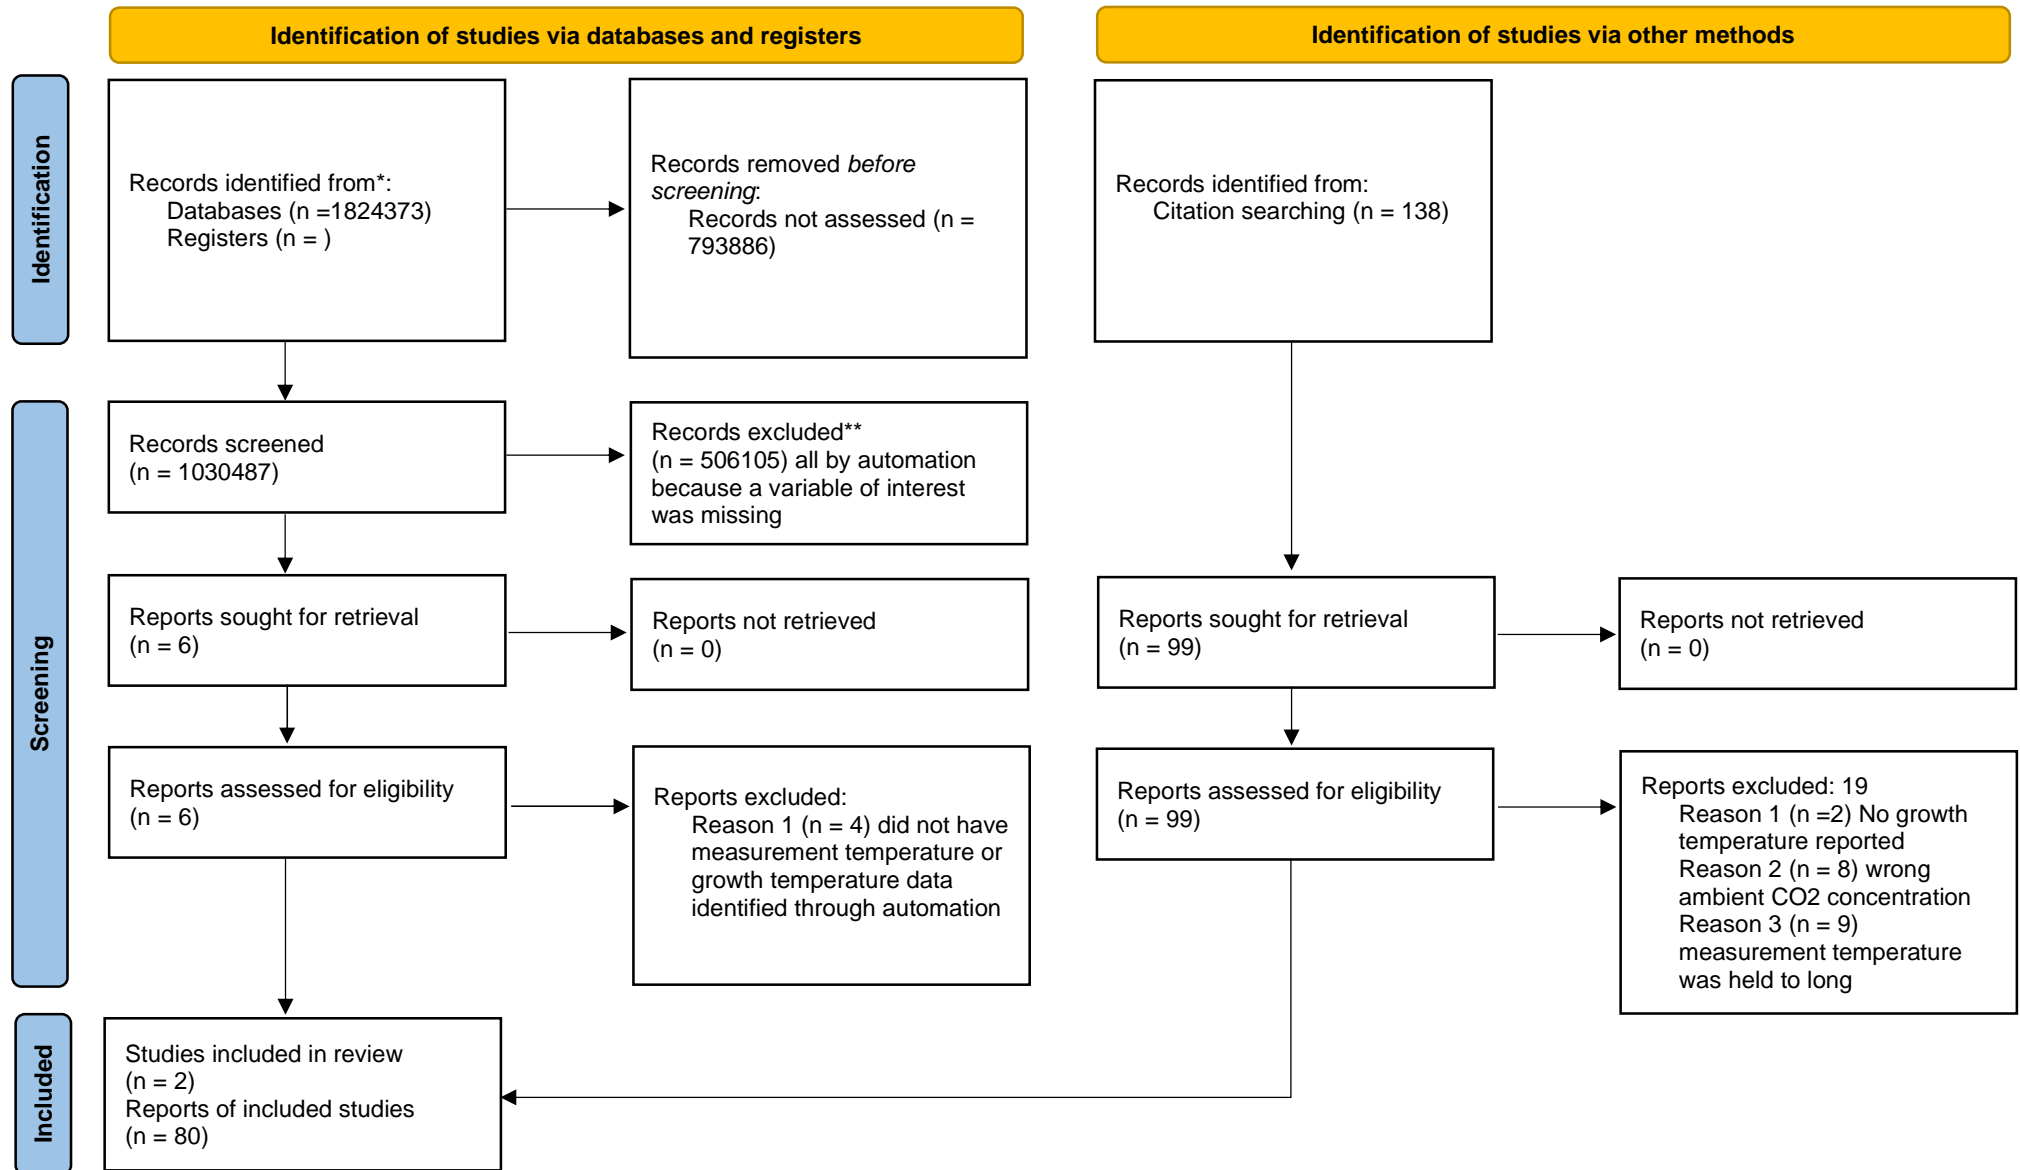

\*Consider, if feasible to do so, reporting the number of records identified from each database or register searched (rather than the total number across all databases/registers).

\*\*If automation tools were used, indicate how many records were excluded by a human and how many were excluded by automation tools.

From: Page MJ, McKenzie JE, Bossuyt PM, Boutron I, Hoffmann TC, Mulrow CD, et al. The PRISMA 2020 statement: an updated guideline for reporting systematic reviews. *BMJ* 2021;372:n71. doi: 10.1136/bmj.n71. For more information, visit: <http://www.prisma-statement.org/>
